# Supplementary material
Source: ML conference proceedings conference paper supplement (https://proceedings.mlr.press/v108/laborde20a.html)
Supplement: Supplementary file 1 [file laborde20a-supp.pdf]

## Supplementary material for "A Lyapunov analysis for accelerated gradient methods: from deterministic to stochastic case"

---

### A Abstract Lyapunov analysis

#### A.1 Proof of Lemma 2.6

By (8) and using (FEP) and (7), we have

$$\begin{aligned}
E(t_{k+1}, z_{k+1}) - E(t_k, z_k) &\leq \partial_t E(t_k, z_k)(t_{k+1} - t_k) \\
&+ \langle \nabla E(t_k, z_k), z_{k+1} - z_k \rangle + \frac{L_E}{2} |z_{k+1} - z_k|^2 \\
&\leq h_k \left( \partial_t E(t_k, z_k) \right. \\
&+ \langle \nabla E(t_k, z_k), g(t_k, z_k, \nabla f(z_k)) \rangle \\
&+ h_k \langle \nabla E(t_k, z_k), g_2(t_k, z_k) e_k \rangle \\
&+ \frac{L_E h_k^2}{2} |g(t_k, z_k, \nabla f(z_k) + e_k)|^2 \\
&\leq -h_k r_E E(t_k, z_k) \\
&- h_k a_E |g(t_k, z_k, \nabla f(z_k))|^2 \\
&+ h_k \langle \nabla E(t_k, z_k), g_2(t_k, z_k) e_k \rangle \\
&+ \frac{L_E h_k^2}{2} |g(t_k, z_k, \nabla f(z_k) + e_k)|^2 \\
&\leq -h_k r_E E(t_k, z_k) \\
&- h_k \left( a_E - \frac{L_E h_k}{2} \right) |g(t_k, z_k, \nabla f(z_k))|^2 \\
&+ h_k \langle \nabla E(t_k, z_k), g_2(t_k, z_k) e_k \rangle \\
&+ L_E h_k^2 \langle g(t_k, z_k, \nabla f(z_k)), g_2(t_k, z_k) e_k \rangle \\
&+ \frac{L_E h_k^2}{2} |g_2(t_k, z_k) e_k|^2,
\end{aligned}$$

which concludes the proof.

#### A.2 Proof of Proposition 2.7

The proof of Proposition 2.7 can be done by induction and is an adaptation of the one of Oberman and Prazeres [2019]. Indeed, the initialization,  $k = 0$ , of  $E_k$  is trivial and for all  $k \geq 1$ , from (12), we have

$$\begin{aligned}
\mathbb{E}[E(t_{k+1}, z_{k+1})] &\leq (1 - h_k r_E) E(t_k, z_k) + \frac{h_k^2 L_E g_2(t_k, z_k)^2 \sigma^2}{2}
\end{aligned}$$

and by definition of  $h_k$ ,  $\alpha$ , and using the induction assumption,

$$\begin{aligned}
\mathbb{E}[E(t_{k+1}, z_{k+1})] &\leq \left( 1 - \frac{2}{k + \alpha^{-1} E_0^{-1}} \right) \frac{1}{\alpha(k + \alpha^{-1} E_0^{-1})} \\
&+ \frac{1}{\alpha(k + \alpha^{-1} E_0^{-1})^2} \\
&\leq \frac{1}{\alpha(k + \alpha^{-1} E_0^{-1})} \\
&- \frac{1}{\alpha(k + \alpha^{-1} E_0^{-1})^2} \\
&\leq \frac{1}{\alpha(k + 1 + \alpha^{-1} E_0^{-1})},
\end{aligned}$$

which concludes the proof.

#### A.3 Proof of Proposition 2.8

First, since  $t_k = \sum_{i=1}^k \frac{c}{i^\alpha}$  ( $t_0 = h_0 = 0$ ), we need  $\alpha < 1$ . Summing (14) over from 0 to  $k - 1$ , we obtain

$$\mathbb{E}[E(t_k, x_k)] \leq E_0 + \frac{\sigma^2}{2} \sum_{i=1}^{k-1} h_i^2 (a_1 + a_2 t_i + a_3 t_i^2).$$

Now we want to prove that  $\mathbb{E}[E(t_k, x_k)]$  is bounded.

- Term  $\frac{a_1 \sigma^2}{2} \sum_{i=1}^{k-1} h_i^2$ : By comparison series-integral, we have

$$\begin{aligned}
\sum_{i=1}^{k-1} \frac{c^2}{i^{2\alpha}} &\leq c^2 \left( 1 + \int_1^k \frac{1}{t^{2\alpha}} dt \right) \\
&\leq c^2 \left( 1 + \left[ \frac{t^{1-2\alpha}}{1-2\alpha} \right]_1^k \right) \\
&\leq \frac{2\alpha c^2}{2\alpha - 1},
\end{aligned}$$

if  $\alpha > \frac{1}{2}$ .

Then,

$$\frac{a_1 \sigma^2}{2} \sum_{i=1}^{k-1} h_i^2 \leq \frac{c^2 \alpha a_1 \sigma^2}{2\alpha - 1}.$$

- Term  $\frac{a_2 \sigma^2}{2} \sum_{i=1}^{k-1} h_i^2 t_i$ : First, we have

$$t_i = \sum_{j=1}^i \frac{c}{j^\alpha} \leq \int_0^i \frac{c}{t^\alpha} dt = \frac{ci^{1-\alpha}}{1-\alpha}.$$

Then,

$$\begin{aligned} \sum_{i=1}^{k-1} h_i^2 t_i &\leq \frac{c^3}{1-\alpha} \sum_{i=1}^{k-1} \frac{1}{i^{3\alpha-1}} \\ &\leq \frac{c^3}{1-\alpha} \left(1 + \frac{1}{3\alpha-2}\right) \\ &= \frac{c^3(3\alpha-1)}{(1-\alpha)(3\alpha-2)}, \end{aligned}$$

if  $\alpha > \frac{2}{3}$ . Now, if  $\alpha > \frac{2}{3}$ . Now, if  $\alpha = \frac{2}{3}$ ,

$$\begin{aligned} \sum_{i=1}^{k-1} h_i^2 t_i &\leq 3c^3 \sum_{i=1}^{k-1} \frac{1}{i} \\ &\leq \frac{c^3}{1-\alpha} (1 + \log(k)). \end{aligned}$$

Then, we have

$$\frac{a_2 \sigma^2}{2} \sum_{i=1}^{k-1} h_i^2 t_i \leq \begin{cases} \frac{c^3(3\alpha-1)a_2 \sigma^2}{2(1-\alpha)(3\alpha-2)}, & \alpha > \frac{2}{3} \\ \frac{3c^3 a_2 \sigma^2}{2} (1 + \log(k)), & \alpha = \frac{2}{3}. \end{cases}$$

- Term  $\frac{a_3 \sigma^2}{2} \sum_{i=1}^{k-1} h_i^2 t_i^2$ :

$$t_i^2 = \left( \sum_{j=1}^i \frac{c}{j^\alpha} \right)^2 \leq \frac{c^2 i^{2-2\alpha}}{(1-\alpha)^2}.$$

Then,

$$\begin{aligned} \sum_{i=1}^{k-1} h_i^2 t_i^2 &\leq \frac{c^4}{(1-\alpha)^2} \sum_{i=1}^{k-1} \frac{1}{i^{4\alpha-2}} \\ &\leq \frac{c^4}{(1-\alpha)^2} \left(1 + \frac{1}{4\alpha-3}\right) \\ &= \frac{c^4(4\alpha-2)}{(1-\alpha)^2(4\alpha-3)}, \end{aligned}$$

if  $\alpha > \frac{3}{4}$ , and, if  $\alpha = \frac{3}{4}$ ,

$$\begin{aligned} \sum_{i=1}^{k-1} h_i^2 t_i^2 &\leq 16c^4 \sum_{i=1}^{k-1} \frac{1}{i} \\ &\leq 16c^4 (1 + \log(k)). \end{aligned}$$

Then, we have

$$\frac{a_3 \sigma^2}{2} \sum_{i=1}^{k-1} h_i^2 t_i^2 \leq \begin{cases} \frac{a_3 c^4 (4\alpha-2) \sigma^2}{2(1-\alpha)^2 (4\alpha-3)}, & \alpha > \frac{3}{4} \\ \frac{16c^4 a_3 \sigma^2}{2} (1 + \log(k)), & \alpha = \frac{3}{4}. \end{cases}$$

So now, we have two cases:

- Case  $a_1, a_2, b_1 > 0, a_3 = b_2 = 0$ : In that case, we have shown that

$$\begin{aligned} &\mathbb{E}[E(t_k, x_k)] \\ &\leq E_0 + \begin{cases} \frac{c^2 \alpha a_1 \sigma^2}{2\alpha-1} + \frac{c^3(3\alpha-1)a_2 \sigma^2}{2(1-\alpha)(3\alpha-2)}, & \alpha > \frac{2}{3} \\ 2c^2 a_1 \sigma^2 + \frac{3c^3 a_2 \sigma^2}{2} (1 + \log(k)), & \alpha = \frac{2}{3}. \end{cases} \end{aligned}$$

In addition, by (15),

$$\mathbb{E}[E(t_k, x_k)] \geq b_1 t_k (\mathbb{E}[f(x_k)] - f^*),$$

combine with

$$t_k \geq \frac{c}{1-\alpha} (k^{1-\alpha} - 1),$$

we obtain

$$\begin{aligned} &\mathbb{E}[f(x_k)] - f^* \\ &\leq \begin{cases} \frac{\frac{1-\alpha}{c} E_0 + \left( \frac{a_1 c(1-\alpha)\alpha}{2\alpha-1} + \frac{a_2 c^2(3\alpha-1)}{2(3\alpha-2)} \right) \sigma^2}{b_1 (k^{1-\alpha} - 1)}, & \alpha \in \left( \frac{2}{3}, 1 \right) \\ \frac{\frac{1}{3c} E_0 + \left( \frac{2a_1 c}{3} + \frac{a_2 c^2}{2} (1 + \log(k)) \right) \sigma^2}{b_1 (k^{1/3} - 1)}, & \alpha = \frac{2}{3}. \end{cases} \end{aligned}$$

- Case  $a_1 = a_2 = b_1 = 0, a_3 > 0, b_2 > 0$ : In that case, we have shown that

$$\begin{aligned} &\mathbb{E}[E(t_k, x_k)] \\ &\leq E_0 + \begin{cases} \frac{a_3 c^4 (4\alpha-2) \sigma^2}{2(1-\alpha)^2 (4\alpha-3)}, & \alpha > \frac{3}{4} \\ \frac{16c^4 a_3 \sigma^2}{2} (1 + \log(k)), & \alpha = \frac{3}{4}. \end{cases} \end{aligned}$$

By (15),

$$\mathbb{E}[E(t_k, x_k)] \geq b_2 t_k^2 (\mathbb{E}[f(x_k)] - f^*),$$

combine with

$$t_k^2 \geq \frac{c^2}{(1-\alpha)^2} (k^{1-\alpha} - 1)^2,$$

we obtain

$$\begin{aligned} &\mathbb{E}[f(x_k)] - f^* \\ &\leq \begin{cases} \frac{\frac{(1-\alpha)^2}{c^2} E_0 + \frac{a_3 c^2 (4\alpha-2) \sigma^2}{2(4\alpha-3)}}{b_2 (k^{1-\alpha} - 1)^2}, & \alpha \in \left( \frac{3}{4}, 1 \right) \\ \frac{\frac{1}{16c^2} E_0 + \frac{a_3 c^2 \sigma^2}{2} (1 + \log(k))}{b_2 (k^{1/4} - 1)^2}, & \alpha = \frac{3}{4}, \end{cases} \end{aligned}$$

which concludes the proof.

## B Gradient descent

### B.1 Proof of Proposition 3.1

- In the convex case, we first start to look for (7):

$$\begin{aligned} &\partial_t E^c(t, z) - \nabla E^c(t, z) \nabla f(z) \\ &= f(z) - f^* - \langle t \nabla f(z) + z - x^*, \nabla f(z) \rangle \\ &= f(z) - f^* - \langle z - x^*, \nabla f(z) \rangle - t |\nabla f(z)|^2 \\ &\leq -t |\nabla f(z)|^2, \end{aligned}$$

by convexity, which gives  $r_{E^c} = 0$  and  $a_{E^c} = t$ . Now, by 1-convexity of the quadratic term and  $L$ -smoothness of  $f$ ,

$$\begin{aligned}
E^c(t_{k+1}, z_{k+1}) - E^c(t_k, z_k) &\leq t_{k+1}(f(z_k) - f^* + \langle \nabla f(z_k), z_{k+1} - z_k \rangle) \\
&\quad + \frac{L}{2}|z_{k+1} - z_k|^2 - t_k(f(z_k) - f^*) \\
&\quad + \frac{1}{2}|z_{k+1} - x^*|^2 - \frac{1}{2}|z_k - x^*|^2 \\
&\leq \langle t_k \nabla f(z_k) + z_k - x^*, z_{k+1} - z_k \rangle \\
&\quad + \frac{Lt_{k+1} + 1}{2}|z_{k+1} - z_k|^2 \\
&\quad + (t_{k+1} - t_k)(f(z_k) - f^*) \\
&\quad + (t_{k+1} - t_k)\langle \nabla f(z_k), z_{k+1} - z_k \rangle \\
&\leq (t_{k+1} - t_k)\partial_t E^c(t_k, z_k) \\
&\quad + \langle \nabla E^c(t_k, z_k), z_{k+1} - z_k \rangle \\
&\quad + \frac{Lt_{k+1} + 1}{2}|z_{k+1} - z_k|^2,
\end{aligned}$$

since, by (16),

$$(t_{k+1} - t_k)\langle \nabla f(z_k), z_{k+1} - z_k \rangle \leq 0.$$

Then  $L_{E^c} = Lt_{k+1} + 1$ .

- In the strongly convex case,

$$\begin{aligned}
\partial_t E^{sc}(z) - \nabla E^{sc}(z)\nabla f(z) &= -\langle \nabla f(z) + \mu(z - x^*), \nabla f(z) \rangle \\
&= -\mu\langle z - x^*, \nabla f(z) \rangle - |\nabla f(z)|^2 \\
&\leq -\mu\left(f(z) - f^* - \frac{\mu}{2}|z - x^*|^2\right) \\
&\quad - |\nabla f(z)|^2,
\end{aligned}$$

by strong convexity and then  $r_{E^{sc}} = \mu$  and  $a_{E^{sc}} = 1$ . Concerning (8), since  $E^{sc}$  is time independent, (8) is equivalent to  $L$ -smoothness condition which gives  $L_{E^{sc}} = L + \mu$ .

## C Accelerated rate: convex case

### C.1 ODE and derivation of Nesterov's method

**Derivation of (H-ODE)** Solve for  $v$  in the first line of (1st-ODE)

$$v = \frac{t}{2}(\dot{x} + \frac{1}{\sqrt{L}}\nabla f(x)) + x$$

differentiate to obtain

$$\dot{v} = \frac{1}{2}(\dot{x} + \frac{1}{\sqrt{L}}\nabla f(x)) + \frac{t}{2}(\ddot{x} + \frac{1}{\sqrt{L}}D^2 f(x) \cdot \dot{x}) + \dot{x}.$$

Insert into the second line of (1st-ODE)

$$\begin{aligned}
\frac{1}{2}(\dot{x} + \frac{1}{\sqrt{L}}\nabla f(x)) + \frac{t}{2}(\ddot{x} + \frac{1}{\sqrt{L}}D^2 f(x) \cdot \dot{x}) + \dot{x} \\
= -\frac{t}{2}\nabla f(x).
\end{aligned}$$

Simplify to obtain (H-ODE).

**Proof of Proposition 4.2** The system (FE-C) with a constant time step  $h_k = \frac{1}{\sqrt{L}}$  gives  $t_k = h(k+2) = \frac{k+2}{\sqrt{L}}$  and

$$\begin{cases} x_{k+1} - x_k &= \frac{2}{k+2}(v_k - x_k) - \frac{1}{L}\nabla f(y_k) \\ v_{k+1} - v_k &= -\frac{k+2}{2L}\nabla f(y_k) \end{cases}$$

Eliminate the variable  $v_k$  using the definition of  $y_k$  in (FE-C) to obtain (C-Nest).

### C.2 Lyapunov analysis for (1st-ODE)

**Proposition C.1.** Suppose  $f$  is convex and  $L$ -smooth. Let  $x, v$  be solutions of (1st-ODE) and let  $E^{ac,c}$  be given by (22). Then  $E^{ac,c}$  is a continuous Lyapunov function with  $r_{E^{ac,c}} = 0$  and  $a_{E^{ac,c}} = \frac{t^2}{\sqrt{L}}$  (with gap  $t^2|\nabla f(x)|^2$ ) i.e.

$$\frac{d}{dt}E^{ac,c}(t, x(t), v(t); 0) \leq -\frac{t^2}{\sqrt{L}}|\nabla f(x)|^2.$$

**Corollary C.2.** Let  $f$  be a convex and  $L$ -smooth function. Let  $(x(t), v(t))$  be a solution to (1st-ODE), then for all  $t > 0$ ,

$$f(x(t)) - f^* \leq \frac{2}{t^2}|v_0 - x^*|^2.$$

*Proof of Proposition C.1.* First, by definition of  $E^{ac,c}$ , we have

$$\begin{aligned}
\frac{d}{dt}E^{ac,c}(t, x(t), v(t)) &\leq 2t(f(x) - f^*) + t^2\langle \nabla f(x), \dot{x} \rangle \\
&\quad + 4\langle v - x^*, \dot{v} \rangle \\
&\leq 2t(f(x) - f^*) + 2t\langle \nabla f(x), v - x \rangle \\
&\quad - \frac{t^2}{\sqrt{L}}|\nabla f(x)|^2 \\
&\quad - 2t\langle v - x^*, \nabla f(x) \rangle \\
&\leq 2t(f(x) - f^* - \langle x - x^*, \nabla f(x) \rangle) \\
&\quad - \frac{t^2}{\sqrt{L}}|\nabla f(x)|^2.
\end{aligned}$$

The proof is concluded by convexity,

$$f(x) - f^* - \langle x - x^*, \nabla f(x) \rangle \leq 0.$$

□

### C.3 Classical inequality in the perturbed case

Before proving Proposition 4.4, using the convexity and the  $L$ -smoothness of  $f$ , we prove a generalization of the classical inequality obtained in Attouch et al. [2016] or Su et al. [2014] in the case  $e_k = 0$ :

$$\begin{aligned}
& t_k^2(f(x_{k+1}) - f^*) - t_{k-1}^2(f(x_k) - f^*) \\
& \leq -h^2(f(x_k) - f^*) \\
& \quad + 2ht_k \langle \nabla f(y_k), v_k - x^* \rangle \\
& \quad - \left( \frac{1}{\sqrt{L}} - \frac{h}{2} \right) ht_k^2 |\nabla f(y_k)|^2 \\
& \quad - \frac{ht_k^2}{\sqrt{L}} \langle \nabla f(y_k), e_k \rangle \\
& \quad + h^2 t_k^2 \left\langle \nabla f(y_k) + \frac{e_k}{2}, e_k \right\rangle. \quad (30)
\end{aligned}$$

The proof is a perturbed version of the one in Beck and Teboulle [2009], Su et al. [2014], Attouch et al. [2016]. First we prove the following inequality:

**Lemma C.3.** *Assume  $f$  is a convex,  $L$ -smooth function. For all  $x, y, z$ ,  $f$  satisfies*

$$f(z) \leq f(x) + \langle \nabla f(y), z - x \rangle + \frac{L}{2} |z - y|^2. \quad (31)$$

*Proof.* By  $L$ -smoothness,

$$f(z) - f(x) \leq f(y) - f(x) + \langle \nabla f(y), z - y \rangle + \frac{L}{2} |z - y|^2.$$

and since  $f$  is convex,

$$f(y) - f(x) \leq \langle \nabla f(y), y - x \rangle.$$

We conclude the proof combining these two inequalities.  $\square$

Now apply inequality (31) at  $(x, y, z) = (x_k, y_k, x_{k+1})$ :

$$\begin{aligned}
& f(x_{k+1}) \\
& \leq f(x_k) + \langle \nabla f(y_k), x_{k+1} - x_k \rangle + \frac{L}{2} |x_{k+1} - y_k|^2 \\
& \leq f(x_k) + \frac{2h}{t_k} \langle \nabla f(y_k), v_k - x_k \rangle - \frac{h}{\sqrt{L}} |\nabla f(y_k)|^2 \\
& \quad - \frac{h}{\sqrt{L}} \langle \nabla f(y_k), e_k \rangle + \frac{h^2}{2} |\nabla f(y_k) + e_k|^2,
\end{aligned}$$

and then

$$\begin{aligned}
& f(x_{k+1}) \\
& \leq f(x_k) + \frac{2h}{t_k} \langle \nabla f(y_k), v_k - x_k \rangle - \left( \frac{1}{\sqrt{L}} - \frac{h}{2} \right) h |\nabla f(y_k)|^2 \\
& \quad - \frac{h}{\sqrt{L}} \langle \nabla f(y_k), e_k \rangle + h^2 \left\langle \nabla f(y_k) + \frac{e_k}{2}, e_k \right\rangle. \quad (32)
\end{aligned}$$

If we apply (31) also at  $(x, y, z) = (x^*, y_k, x_{k+1})$  we obtain

$$\begin{aligned}
& f(x_{k+1}) \\
& \leq f^* + \langle \nabla f(y_k), x_{k+1} - x^* \rangle + \frac{L}{2} |x_{k+1} - y_k|^2 \\
& \leq f^* + \langle \nabla f(y_k), y_k - x^* \rangle - \frac{h}{\sqrt{L}} |\nabla f(y_k)|^2 \\
& \quad - \frac{h}{\sqrt{L}} \langle \nabla f(y_k), e_k \rangle + \frac{h^2}{2} |\nabla f(y_k) + e_k|^2
\end{aligned}$$

then,

$$\begin{aligned}
& f(x_{k+1}) \\
& \leq f^* + \langle \nabla f(y_k), y_k - x^* \rangle - \left( \frac{1}{\sqrt{L}} - \frac{h}{2} \right) h |\nabla f(y_k)|^2 \\
& \quad - \frac{h}{\sqrt{L}} \langle \nabla f(y_k), e_k \rangle + h^2 \left\langle \nabla f(y_k) + \frac{e_k}{2}, e_k \right\rangle. \quad (33)
\end{aligned}$$

Summing  $\left(1 - \frac{2h}{t_k}\right)$ (32) and  $\frac{2h}{t_k}$ (33), we have

$$\begin{aligned}
& f(x_{k+1}) - f^* \leq \left(1 - \frac{2h}{t_k}\right) (f(x_k) - f^*) \\
& \quad + \frac{2h}{t_k} \langle \nabla f(y_k), v_k - x^* \rangle \\
& \quad - \left( \frac{1}{\sqrt{L}} - \frac{h}{2} \right) h |\nabla f(y_k)|^2 \\
& \quad - \frac{h}{\sqrt{L}} \langle \nabla f(y_k), e_k \rangle \\
& \quad + h^2 \left\langle \nabla f(y_k) + \frac{e_k}{2}, e_k \right\rangle.
\end{aligned}$$

Then,

$$\begin{aligned}
& t_k^2(f(x_{k+1}) - f^*) \leq (t_k - 2h) t_k (f(x_k) - f^*) \\
& \quad + 2ht_k \langle \nabla f(y_k), v_k - x^* \rangle \\
& \quad - \left( \frac{1}{\sqrt{L}} - \frac{h}{2} \right) ht_k^2 |\nabla f(y_k)|^2 \\
& \quad - \frac{ht_k^2}{\sqrt{L}} \langle \nabla f(y_k), e_k \rangle \\
& \quad + h^2 t_k^2 \left\langle \nabla f(y_k) + \frac{e_k}{2}, e_k \right\rangle \\
& \leq (t_{k-1}^2 - h^2) (f(x_k) - f^*) \\
& \quad + 2ht_k \langle \nabla f(y_k), v_k - x^* \rangle \\
& \quad - \left( \frac{1}{\sqrt{L}} - \frac{h}{2} \right) ht_k^2 |\nabla f(y_k)|^2 \\
& \quad - \frac{ht_k^2}{\sqrt{L}} \langle \nabla f(y_k), e_k \rangle \\
& \quad + h^2 t_k^2 \left\langle \nabla f(y_k) + \frac{e_k}{2}, e_k \right\rangle,
\end{aligned}$$

which concludes the proof.

#### C.4 Proof of Proposition 4.4

By definition of  $v_{k+1}$ , we have

$$\begin{aligned}
& 2|v_{k+1} - x^*|^2 - 2|v_k - x^*|^2 \\
&= -2ht_k \langle v_k - x^*, \nabla f(y_k) + e_k \rangle \\
&+ \frac{h^2 t_k^2}{2} |\nabla f(y_k) + e_k|^2 \\
&= -2ht_k \langle v_k - x^*, \nabla f(y_k) \rangle \\
&+ \frac{h^2 t_k^2}{2} |\nabla f(y_k)|^2 \\
&- 2ht_k \langle v_k - x^*, e_k \rangle \\
&+ h^2 t_k^2 \left\langle \nabla f(y_k) + \frac{e_k}{2}, e_k \right\rangle.
\end{aligned}$$

Therefore, combining it with (30) from Appendix C.3, we obtain

$$\begin{aligned}
& E_{k+1}^{ac,c} - E_k^{ac,c} \leq -h^2 (f(x_k) - f^*) \\
&- \left( \frac{1}{\sqrt{L}} - h \right) ht_k^2 |\nabla f(y_k)|^2 \\
&- 2ht_k \langle v_k - x^* - \frac{t_k}{\sqrt{L}} \nabla f(y_k), e_k \rangle \\
&+ 2h^2 t_k^2 \left\langle \nabla f(y_k) + \frac{e_k}{2}, e_k \right\rangle,
\end{aligned}$$

and (24) is proved.

## D Accelerated rate: strongly convex case

### D.1 ODE and derivation of Nesterov's method

**Equivalence between (1st-ODE-SC) and (H-ODE-SC)** Solve for  $v$  in the first line of (1st-ODE-SC)

$$v = \frac{1}{\sqrt{\mu}} (\dot{x} + \frac{1}{\sqrt{L}} \nabla f(x)) + x$$

differentiate to obtain

$$\dot{v} = \frac{1}{\sqrt{\mu}} (\ddot{x} + \frac{1}{\sqrt{L}} D^2 f(x) \cdot \dot{x}) + \dot{x}.$$

Insert into the second line of (1st-ODE-SC)

$$\begin{aligned}
& \frac{1}{\sqrt{\mu}} (\ddot{x} + \frac{1}{\sqrt{L}} D^2 f(x) \cdot \dot{x}) + \dot{x} \\
&= -\dot{x} - \left( \frac{1}{\sqrt{L}} + \frac{1}{\sqrt{\mu}} \right) \nabla f(x).
\end{aligned}$$

Simplify to obtain (H-ODE-SC).

**Proof of Proposition 5.3** (FE-SC) with  $h_k = 1/\sqrt{L}$  becomes

$$\begin{cases} x_{k+1} - x_k &= \frac{\sqrt{C_f^{-1}}}{1 + \sqrt{C_f^{-1}}} (v_k - x_k) - \frac{1}{L} \nabla f(y_k) \\ v_{k+1} - v_k &= \frac{\sqrt{C_f^{-1}}}{1 + \sqrt{C_f^{-1}}} (x_k - v_k) - \frac{1}{\sqrt{L}\mu} \nabla f(y_k) \end{cases}$$

Eliminate the variable  $v_k$  using the definition of  $y_k$  to obtain (SC-Nest).

### D.2 Lyapunov analysis

In the next proposition, we show that  $E^{ac,c}$  is a rate-generating Lyapunov function, in the sense of Definition 2.3, for system (1st-ODE-SC) and its explicit discretization (FE-SC).

**Proposition D.1.** *Suppose  $f$  is  $\mu$ -strongly convex and  $L$ -smooth. Let  $(x, v)$  be a solution of (1st-ODE-SC) and  $(x_k, v_k)$  be a sequences generated by (FE-SC). Let  $E^{ac,sc}$  be given by (27). Then  $E^{ac,sc}$  is a continuous Lyapunov function with  $r_{E^{ac,sc}} = \sqrt{\mu}$  and  $a_{E^{ac,sc}} = \frac{1}{\sqrt{L}}$  i.e.*

$$\begin{aligned}
& \frac{d}{dt} E^{ac,sc}(x, v) \\
&\leq -\sqrt{\mu} E^{ac,sc}(x, v) - \frac{1}{\sqrt{L}} |\nabla f(x)|^2 - \frac{\mu\sqrt{\mu}}{2} |v - x|^2.
\end{aligned} \tag{34}$$

Then we retrieve the usual optimal rates in the continuous and discrete cases.

**Corollary D.2.** *Let  $f$  be a  $\mu$ -strongly convex and  $L$ -smooth function. Let  $(x(t), v(t))$  be a solution to (1st-ODE), then for all  $t > 0$ ,*

$$f(x(t)) - f^* + \frac{\mu}{2} |v(t) - x^*|^2 \leq \exp(-\sqrt{\mu}t) E^{ac,sc}(x_0, v_0).$$

The proof of Corollary D.2 results immediately from Proposition D.1 and then, we focus on the proof of (34) in the following.

*Proof of (34).* Using (1st-ODE-SC), we obtain

$$\begin{aligned}
 \frac{d}{dt} E^{ac,sc}(x, v) &= \langle \nabla f(x), \dot{x} \rangle \\
 &+ \sqrt{\mu} \langle v - x^*, \dot{v} \rangle \\
 &= \sqrt{\mu} \langle \nabla f(x), v - x \rangle \\
 &- \frac{1}{\sqrt{L}} |\nabla f(x)|^2 - \mu \sqrt{\mu} \langle v - x^*, v - x \rangle \\
 &- \sqrt{\mu} \langle \nabla f(x), v - x^* \rangle \\
 &= -\sqrt{\mu} \langle \nabla f(x), x - x^* \rangle \\
 &- \frac{1}{\sqrt{L}} |\nabla f(x)|^2 \\
 &- \frac{\mu \sqrt{\mu}}{2} [|v - x^*|^2 + |v - x|^2 - |x - x^*|^2].
 \end{aligned}$$

By strong convexity, we have

$$\begin{aligned}
 \frac{d}{dt} E^{ac,sc}(x, v) &\leq -\sqrt{\mu} \left( f(x) - f^* + \frac{\mu}{2} |x - x^*|^2 \right) \\
 &- \frac{1}{\sqrt{L}} |\nabla f(x)|^2 \\
 &- \frac{\mu \sqrt{\mu}}{2} [|v - x^*|^2 + |v - x|^2 - |x - x^*|^2] \\
 &\leq -\sqrt{\mu} E^{ac,sc}(x, v) \\
 &- \frac{1}{\sqrt{L}} |\nabla f(x)|^2 - \frac{\mu \sqrt{\mu}}{2} |v - x|^2.
 \end{aligned}$$

which establishes (34).  $\square$

### D.3 Proof of Proposition 5.5

First, arguing as in Proposition D.1,

$$\begin{aligned}
 f(x_{k+1}) - f(x_k) &\leq \langle \nabla f(y_k), y_k - x_k \rangle - \frac{\mu}{2} |y_k - x_k|^2 \\
 &+ \left( \frac{h^2}{2} - \frac{h}{\sqrt{L}} \right) |\nabla f(y_k)|^2 \\
 &- \frac{h}{\sqrt{L}} \langle \nabla f(y_k), e_k \rangle \\
 &+ h^2 \left\langle \nabla f(y_k) + \frac{e_k}{2}, e_k \right\rangle,
 \end{aligned}$$

and,

$$\begin{aligned}
 \frac{\mu}{2} |v_{k+1} - x^*|^2 - \frac{\mu}{2} |v_k - x^*|^2 \\
 &\leq -h \sqrt{\mu} E_k^{ac,sc} \\
 &+ (\sqrt{\mu} + Lh) \frac{\sqrt{\mu}}{2} |x_k - y_k|^2 + \frac{h^2}{2} |\nabla f(y_k)|^2 \\
 &- h \sqrt{\mu} \langle v_k - x^* + x_k - y_k, e_k \rangle \\
 &+ h^2 \left\langle \nabla f(y_k) + \frac{e_k}{2}, e_k \right\rangle.
 \end{aligned}$$

Summing these two inequalities,

$$\begin{aligned}
 E_{k+1}^{ac,sc} - E_k^{ac,sc} &\leq -h \sqrt{\mu} E_k^{ac,sc} + \left( h^2 - \frac{h}{\sqrt{L}} \right) |\nabla f(y_k)|^2 \\
 &+ \left( \frac{h \sqrt{\mu} L}{2} - \frac{\sqrt{\mu}}{2h} \right) |x_k - y_k|^2 \\
 &- h \sqrt{\mu} \langle x_k - y_k + v_k - x^*, e_k \rangle \\
 &+ \frac{h}{\sqrt{L}} \langle \nabla f(y_k), e_k \rangle + 2h^2 \left\langle \nabla f(y_k) + \frac{e_k}{2}, e_k \right\rangle.
 \end{aligned}$$
